# Supplementary material
Source: ML conference proceedings conference paper supplement (https://openreview.net/forum?id=tUHABDZP0Q)
Supplement: supplementary_material [file attachment]

---

# Supplementary to “Reinforced Cross-Domain Knowledge Distillation on Time Series Data”

---

Anonymous Author(s)

Affiliation

Address

email

## 1 Uncertainty Estimation with Monte Carlo Dropout Method

2 Given an input data set  $X = \{x_1, \dots, x_n\}$  and the respective outputs  $Y = \{y_1, \dots, y_n\}$ , the conven-  
3 tional machine learning methods intend to find an optimal model  $\Phi(x; \theta)$ , which is parameterized  
4 with  $\theta$ , to map the input  $X$  to the  $Y$ . After training, the optimal model  $\Phi(x; \theta)$  will give a single  
5 point prediction for certain test sample with static  $\theta$ . On the contrary, the Bayesian methods (*e.g.*,  
6 Bayesian neural networks) can generate predictive distributions instead of a single point prediction  
7 for estimating model uncertainty. With defining  $\Phi(x; \theta)$  with a prior  $P(\theta)$  over parameter space  $\theta$ ,  
8 the training objective is then turned to find an optimal posterior distribution over  $\theta$ :

$$P(\theta|X, Y) = \frac{P(Y|X, \theta)P(\theta)}{P(Y|X)}. \quad (1)$$

9 The prediction value of  $y$  with input  $x$  is the weighted average of model predictions over all possible  
10 sets of parameters  $\theta$  with various posterior probabilities as Eq. (2) shows.

$$\begin{aligned} P(y|x, X, Y) &= \int P(y|x, \theta)P(\theta|X, Y)d\theta \\ &= \mathbb{E}_{\theta \sim P(\theta|X, Y)}[\Phi(x; \theta)] \end{aligned} \quad (2)$$

11 However, the posterior distribution  $P(\theta|X, Y)$  is intractable as shown in previous works. Alter-  
12 natively, Gal and Ghahramani proved that a DNN with arbitrary non-linear depth and dropout is  
13 mathematically equivalent to a Bayesian approximation of the probabilistic deep Gaussian process.  
14 They proposed a method named Monte Carlo Dropout which utilizes a dropout distribution  $\hat{P}(\theta)$   
15 to approximate  $P(\theta|X, Y)$ . To be specific, for the  $l$ -th layer ( $l = 1, \dots, L$ ) in a model with total  $L$   
16 layers, the parameter distribution  $\theta_l$  is defined as:

$$\theta_l = \mathbf{M}_l * \text{diag}([Z_{l,i}]_{i=1}^{D_l}), \quad (3)$$

17 where  $\mathbf{M}_l \in \mathcal{R}^{D_l \times D_{l-1}}$  is a matrix with variational parameters and  $\text{diag}(\cdot)$  is an operator to map  
18 a vector to a diagonal matrix.  $Z_{l,i} \sim \text{Bernoulli}(q_i)$  is independently sampled from Bernoulli  
19 distribution, where  $i = 1, \dots, D_{l-1}$ .  $q_i$  is the probability of dropout. Subsequently, the Eq. (2) is  
20 reformulated as:

$$\mathbb{E}_{\theta \sim \hat{P}(\theta)}[\Phi(x; \theta)] \approx \frac{1}{N} \sum_{n=1}^N \Phi(x; \theta^n). \quad (4)$$

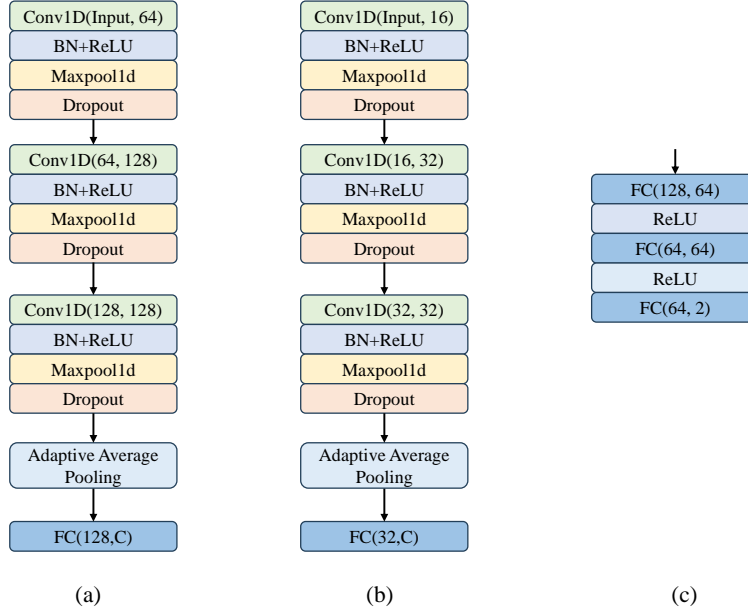

Figure 1: Network Architectures for (a) **1D-CNN Teacher**, (b) **1D-CNN Student** and (c) **Domain Discriminator**.

21 Practically, Eq. (4) means to enable the dropout of model during test phase and forward  $N$  times for  
 22 each sample  $x_i$ . Furthermore, for classification tasks we employ the entropy to measure teacher’s  
 23 uncertainty on target data as Eq. (5) shows:

$$\mathcal{H}_i = - \sum_c \left( \frac{1}{N} \sum_n p(y = c | x_i, \theta^n) \log \left( \frac{1}{N} \sum_n p(y = c | x_i, \theta^n) \right) \right), \quad (5)$$

24 where  $p(y = c | x_i, \theta^n)$  represents the probability of sample belong to class  $c$  and it is the softmax  
 25 outputs of teacher model  $\Phi(x; \theta^n)$  on the  $n$ -th forward pass. Intuitively, a higher value of the  
 26 predictive entropy  $\mathcal{H}_i$  will be obtained when all classes are predicted to have equal probabilities,  
 27 which means the teacher is less confident about the specific data.

## 28 **2 Model Architecture**

### 29 **2.1 Teacher and Student model**

30 As illustrated in Fig. 1(a) and (b), the teacher and student model are constructed with three stacked  
 31 CNN blocks as the backbone and one fully connected layer as the classifier. Each CNN block consists  
 32 of a 1D convolutional layer, followed by a BatchNorm layer, an activation layer (ReLU), a 1D  
 33 MaxPooling layer and a Dropout layer. Here, ‘Conv1D’ represents the 1D convolutional layer and  
 34 the first variable in the bracket represents the number of input channels and the second one represents  
 35 the number of output channels. ‘BN’ is a BatchNorm layer. ‘FC’ represents a fully connected layer.  
 36 ‘C’ represents the number of classes.

37 Meanwhile, we also compared the complexity of teacher and student model as shown in Table 1. The  
 38 compact student is about  $15\times$  smaller in terms of number of trainable parameters and  $17\times$  faster in  
 39 terms of number of floating point operations (FLOPs) than the cumbersome teacher model.

### 40 **2.2 Domain discriminator**

41 Fig. 1(c) is the network architecture of domain discriminator. It consists of three linear layer followed  
 42 by ReLU activation layers. The output of domain discriminator is a 2-classes probability distribution

Table 1: Comparison of model complexity.

|                   | No. of trainable Parameters | No. of FLOPs       |
|-------------------|-----------------------------|--------------------|
| Teacher           | $2.01 \times 10^5$          | $9.17 \times 10^5$ |
| Student           | $0.13 \times 10^5$          | $0.54 \times 10^5$ |
| Compression Ratio | $15.46 \times$              | $16.98 \times$     |

Table 2: Network Architecture for Dueling DDQN.

| Layers | Dueling DDQN            |                         |
|--------|-------------------------|-------------------------|
| #1     | FC(Input, 1024)+ReLU    |                         |
| #2     | NoisyFC(1024,1024)+ReLU | NoisyFC(1024,1024)+ReLU |
| #3     | NoisyFC(1024,1)+ReLU    | NoisyFC(1024, 2)+ReLU   |
| #4     | Aggregation             |                         |

to indicate whether the feature maps come from the teacher with source domain data as input or from the student with target domain data as input.

### 2.3 Dueling DDQN

Table 2 presents the details of our dueling DDQN. The left column is the state-value estimation stream and the right column is the advantage estimation column. The ‘NoisyFC’ represents a linear layer whose weights and biases are perturbed by a parametric function of the noise. The conventional linear layer can be expressed as  $y = wx + b$ , where  $w \in \mathbb{R}^{q \times p}$ ,  $b \in \mathbb{R}^q$  are trainable weights and biases,  $x \in \mathbb{R}^p$  and  $y \in \mathbb{R}^q$  are the inputs and outputs, respectively. In the NoisyNets, the weights and biases are reformulated as Eq. (6) and (7), respectively. Here,  $\mu^w \in \mathbb{R}^{q \times p}$ ,  $\sigma^w \in \mathbb{R}^{q \times p}$ ,  $\mu^b \in \mathbb{R}^q$ ,  $\sigma^b \in \mathbb{R}^q$  are the trainable weights and biases.  $\odot$  is the element-wise multiplication.  $\epsilon^w$  and  $\epsilon^b$  are the factorised Gaussian noise, where each entry  $\epsilon_{i,j}^w = f(\epsilon_i)f(\epsilon_j)$ ,  $\epsilon_j^b = f(\epsilon_j)$  and  $f(x) = \text{sgn}(x)\sqrt{|x|}$ . Adding such parametric noise to the deep reinforcement learning agent will enhance the efficiency of exploration.

$$w = \mu^w + \sigma^w \odot \epsilon^w \quad (6)$$

$$b = \mu^b + \sigma^b \odot \epsilon^b \quad (7)$$

## 3 Additional Transfer Scenarios

We evaluate our proposed method on another five additional transfer scenarios on four datasets as shown in Table 3 and Table 4. From above two Tables, we can see that our proposed method consistently achieves better performance than other SOTA methods, further indicating its effectiveness in transferring the knowledge under the cross-domain scenarios.

Table 3: Marco F1-scores on HAR and HHAR across three independent runs.

| Methods         | HAR Transfer Scenarios |              |            |            |              |              | HHAR Transfer Scenarios |              |              |              |              |              |
|-----------------|------------------------|--------------|------------|------------|--------------|--------------|-------------------------|--------------|--------------|--------------|--------------|--------------|
|                 | 18→27                  | 20→5         | 24→8       | 28→27      | 30→20        | Avg          | 0→2                     | 5→0          | 6→1          | 7→4          | 8→3          | Avg          |
| Teacher         | 98.23                  | 90.57        | 97.08      | 100        | 92.21        | 95.62        | 66.56                   | 33.25        | 94.47        | 94.99        | 96.68        | 77.19        |
| Student-Only    | 98.37                  | 48.78        | 77.38      | 61.17      | 76.41        | 72.42        | 61.94                   | 27.43        | 69.10        | 77.72        | 80.51        | 63.34        |
| KD-STDA         | <b>100</b>             | 75.77        | 90.77      | 97.77      | 86.36        | 90.13        | 61.93                   | 28.04        | 92.65        | 91.33        | 96.30        | 74.05        |
| KA-MCD          | 85.22                  | 78.03        | 86.14      | 91.19      | 74.28        | 82.97        | 43.90                   | 33.35        | 92.32        | 94.27        | 97.02        | 72.17        |
| MLD-DA          | 98.82                  | 80.57        | 91.90      | <b>100</b> | 91.69        | 92.60        | 65.44                   | 31.10        | 92.97        | 94.97        | 95.87        | 76.07        |
| REDA            | 98.20                  | <b>95.05</b> | 91.26      | 98.53      | 72.04        | 91.02        | 54.18                   | 32.56        | 88.50        | 88.84        | 96.18        | 72.05        |
| AAD             | 90.27                  | 66.88        | 86.09      | 94.73      | 84.82        | 84.56        | 58.23                   | 37.24        | 91.47        | 81.99        | 83.61        | 70.51        |
| MobileDA        | 92.86                  | 84.96        | 90.45      | 79.12      | 77.56        | 84.99        | 50.27                   | 30.83        | 76.12        | 89.70        | 79.25        | 65.23        |
| UNI-KD          | <b>100</b>             | 94.42        | <b>100</b> | 92.26      | 87.10        | 94.76        | 62.33                   | <b>39.01</b> | 92.89        | <b>96.90</b> | 96.52        | 77.53        |
| <b>Proposed</b> | <b>100</b>             | 85.26        | 97.92      | <b>100</b> | <b>92.21</b> | <b>95.08</b> | <b>67.27</b>            | 38.25        | <b>94.59</b> | 95.83        | <b>97.40</b> | <b>78.67</b> |

Table 4: Marco F1-scores on FD and SSC across three independent runs.

| Methods         | FD Transfer Scenarios |              |              |            |              |              | SSC Transfer Scenarios |              |              |              |              |              |
|-----------------|-----------------------|--------------|--------------|------------|--------------|--------------|------------------------|--------------|--------------|--------------|--------------|--------------|
|                 | 1→0                   | 1→3          | 3→0          | 3→1        | 3→2          | Avg          | 3→19                   | 5→15         | 6→2          | 13→17        | 18→12        | Avg          |
| Teacher         | 66.40                 | 100          | 62.30        | 100        | 81.65        | 82.07        | 71.85                  | 73.69        | 72.21        | 50.74        | 52.96        | 64.29        |
| Student-Only    | 45.13                 | 91.14        | 44.84        | 93.03      | 70.55        | 68.94        | 43.65                  | 41.04        | 48.21        | 38.78        | 47.28        | 43.79        |
| KD-STDA         | 47.55                 | 93.02        | 51.26        | 99.81      | 76.28        | 73.58        | 61.24                  | 66.97        | 67.05        | 43.05        | 49.92        | 57.65        |
| KA-MCD          | 51.77                 | 98.69        | 48.50        | 93.65      | 83.05        | 75.13        | 61.13                  | 63.23        | 70.96        | 39.56        | 46.86        | 56.35        |
| MLD-DA          | 51.98                 | 99.67        | 52.14        | 96.01      | 75.62        | 75.08        | 66.23                  | 70.30        | 69.33        | 44.22        | 44.13        | 57.65        |
| REDA            | 53.65                 | 96.21        | 52.48        | 96.60      | 80.85        | 75.96        | 56.09                  | 61.96        | 53.59        | 40.50        | 36.26        | 49.68        |
| AAD             | 46.42                 | 94.65        | 52.09        | 98.65      | 87.11        | 75.78        | 62.75                  | 64.81        | <b>71.78</b> | 44.52        | 49.18        | 58.61        |
| MobileDA        | 51.71                 | 94.92        | 51.17        | 99.86      | 78.51        | 75.23        | 64.16                  | 67.67        | 56.74        | 47.50        | <b>56.56</b> | 58.53        |
| UNI-KD          | 60.91                 | <b>99.97</b> | 61.00        | <b>100</b> | 87.08        | 81.79        | 66.84                  | 70.76        | 65.70        | <b>50.19</b> | 49.77        | 60.65        |
| <b>Proposed</b> | <b>61.99</b>          | 99.67        | <b>62.42</b> | <b>100</b> | <b>87.76</b> | <b>82.37</b> | <b>69.49</b>           | <b>72.73</b> | 67.01        | 49.31        | 52.52        | <b>62.21</b> |

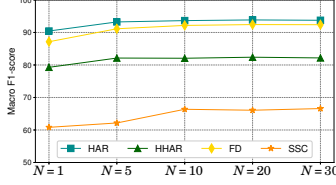Figure 2: Sensitivity of  $N$ .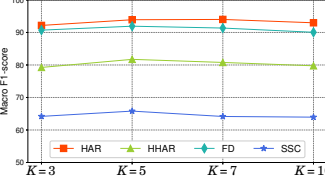Figure 3: Sensitivity of  $K$ .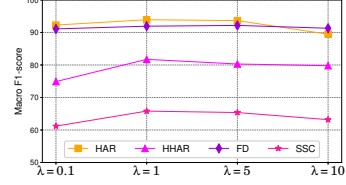Figure 4: Sensitivity of  $\lambda$ .Table 5: Sensitivity Analysis on  $\alpha_1$  and  $\alpha_2$ .

| Dataset | $\alpha_1=0.2$<br>$\alpha_2=1.8$ | $\alpha_1=0.4$<br>$\alpha_2=1.6$ | $\alpha_1=0.6$<br>$\alpha_2=1.4$ | $\alpha_1=0.8$<br>$\alpha_2=1.2$ | $\alpha_1=1.0$<br>$\alpha_2=1.0$ | $\alpha_1=1.2$<br>$\alpha_2=0.8$ | $\alpha_1=1.4$<br>$\alpha_2=0.6$ | $\alpha_1=1.6$<br>$\alpha_2=0.4$ | $\alpha_1=1.8$<br>$\alpha_2=0.2$ |
|---------|----------------------------------|----------------------------------|----------------------------------|----------------------------------|----------------------------------|----------------------------------|----------------------------------|----------------------------------|----------------------------------|
| HAR     | <b>94.68</b>                     | 94.23                            | 94.49                            | 93.58                            | 93.25                            | 92.65                            | 92.68                            | 92.72                            | 92.05                            |
| HHAR    | <b>82.37</b>                     | 82.35                            | 94.49                            | 82.10                            | 81.59                            | 82.11                            | 81.04                            | 81.25                            | 81.34                            |
| FD      | 92.63                            | 92.34                            | <b>92.87</b>                     | 92.10                            | 91.89                            | 91.74                            | 92.01                            | 91.34                            | 92.05                            |
| SSC     | 68.26                            | <b>68.47</b>                     | 68.15                            | 67.65                            | 67.80                            | 66.65                            | 66.95                            | 66.35                            | 66.01                            |

## 4 Sensitivity Analysis

### 4.1 Hyper parameter $N$

In our proposed method, one of the key hyper parameters is  $N$ , which is the number of teachers utilized for calculating the uncertainty on a specific sample. It relates to our reward function, thus affecting the learning process of target sample selection policy. Intuitively, the larger  $N$  will lead to more accurate estimation of teacher’s uncertainty and provide more accurate reward. As illustrated in Fig. 2, student’s performance is gradually increased with  $N$  but will keep at some certain level when  $N \geq 10$ . The larger value of  $N$  also increases the total cost in terms of training time. Empirically,  $N = 5$  or  $N = 10$  are appropriate, and we choose  $N = 10$  in our experiments for all the datasets.

### 4.2 Hyper parameter $K$

Another hyper parameter in our proposed approach is the episodes length  $K$  for generating historical experience and we perform the analysis as illustrated in Fig. 3. From Fig. 3, we can see that our proposed method is not very sensitive to  $K$ . But a large value of  $K$  will result in longer training time.  $K = 5$  is sufficient to generate informative historical experience for training the dueling DDQN.

### 4.3 Hyper parameter $\lambda$

Regarding hyper parameter  $\lambda$  which is to balance the contribution of domain confusion loss  $\mathcal{L}_{DC}$  and the distillation loss  $\mathcal{L}_{RKD}$ , we can see from Fig. 4 that a small value of  $\lambda$  (e.g.  $\lambda = 0.1$ ) will make the student more focus on learning domain-invariant knowledge from  $\mathcal{L}_{DC}$ . It will result in worse performance in datasets like **HHAR** and **SSC**. A higher value of  $\lambda$  will obviously enhance student’s generalization capability on target domain.  $\lambda \in [1, 5]$  is a suitable range based on our experiment results.

#### 82 **4.4 Hyper parameter $\alpha_1$ and $\alpha_2$**

83 To limit our reward within the range of -1 to 1,  $\alpha_1$  and  $\alpha_2$  should satisfy below constrains:  $\alpha_1 \in (0, 2)$ ,  
84  $\alpha_2 \in (0, 2)$  and  $\alpha_1 + \alpha_2 = 2$ . We perform grid search on four datasets as shown in Table 5. We  
85 can see that the student trained with low  $\alpha_1$  value and high  $\alpha_2$  value can achieve better performance  
86 than other configurations, indicating transferability contributes more to the final performance than  
87 uncertainty. In all of our experiments, we set  $\alpha_1 = 0.2$  and  $\alpha_2 = 1.8$  for all datasets for simplicity.
